# Supplementary material for: Distinct genetic architecture underlies the emergence of sleep loss and prey-seeking behavior in the Mexican cavefish
Source: PubMed Central journal article supplement (PMC4364459; doi:10.1186/s12915-015-0119-3), 2015-02-20
Supplement: 12915_2015_119_MOESM2_ESM.pdf [file 12915_2015_119_MOESM2_ESM.pdf]

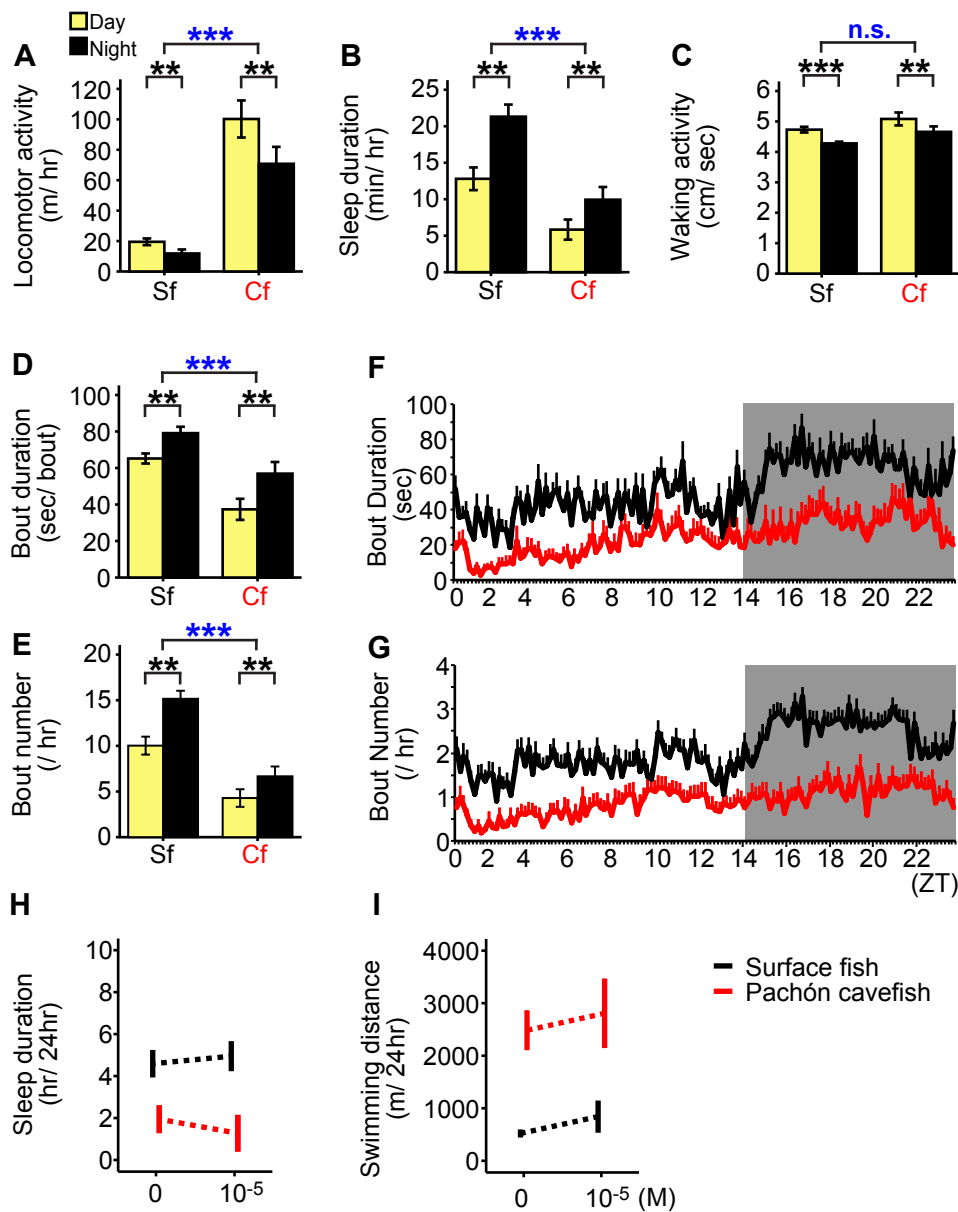

### Additional file 2. Diurnal activity patterns in surface fish and Pachón cavefish.

(A-F) Day (yellow bars) and night (black bars) scores of locomotor activity (m/ hr, A), sleep duration (min/ hr, B), waking activity (cm/ sec, C), bout duration (sec/ bout, D) and bout number (/hr, E). Blue stars or non-significant (n.s.) are for the comparison between surface fish (Sf) and Pachón cavefish (Cf). Cavefish and surface fish changed their day-night activities significantly. Two-way ANOVA statistics for each phenotype are: for locomotor activity (A) between surface fish (Sf) and cavefish (Cf):  $F_{1,83} = 35.1$ ,  $P < 0.001$ , between day and night:  $F_{1,83} = 53.3$ ,  $P < 0.001$ , interaction between population and day-night:  $F_{1,83} = 18.4$ ,  $P < 0.001$ ; for sleep duration (B) between Sf and Cf:  $F_{1,83} = 19.8$ ,  $P < 0.001$ , between day and night:  $F_{1,83} = 40.9$ ,  $P < 0.001$ , interaction between population and day-night:  $F_{1,83} = 6.0$ ,  $P = 0.016$ ; for waking activity (C) between Sf and Cf:  $F_{1,83} = 3.3$ ,  $P = 0.074$ , between day and night:  $F_{1,83} = 40.9$ ,  $P < 0.001$ , interaction between population and day-night:  $F_{1,83} = 0.0$ ,  $P = 0.838$ ; for bout duration (D) between Sf and Cf:  $F_{1,83} = 16.3$ ,  $P < 0.001$ , between day and night:  $F_{1,83} = 30.1$ ,  $P < 0.001$ , interaction between population and day-night:  $F_{1,83} = 0.9$ ,  $P = 0.356$ ; for bout number (E) between Sf and Cf:  $F_{1,83} = 31.0$ ,  $P < 0.001$ , between day and night:  $F_{1,83} = 48.6$ ,  $P < 0.001$ , interaction between population and day-night:  $F_{1,83} = 6.5$ ,  $P = 0.012$ . For all analyses,  $N = 42$  and  $43$  for surface fish and Pachón cavefish, respectively. Difference between day and night activities were tested by post-hoc paired t-test with Bonferroni correction and denoted by black asterisks. \*\*\* denotes  $P < 0.001$ . \*\* denotes  $P < 0.01$  (F, G) Average bout duration (sec/ bout) and bout number in every 10 min were measured and plotted in 24 hrs, respectively. Bars at each 10 min represent mean + s.e.m. X-axis represents time (Zeitgeber 24 hrs). Both surface fish (black line) and Pachón cavefish (red line) showed day (ZT 0 – 14) and night (ZT 14 – 24) rhythm. (H, I) A noradrenalin antagonist, Propranolol, did not increase sleep (H) or reduce swimming distance (I) in adult cavefish.  $N = 10$  and  $10$  for surface fish and Pachón cavefish, respectively. Two-way repeated ANOVA in sleep duration of cavefish:  $F_{1,2, 10.7} = 0.7$ ,  $P = 0.443$ ; in swimming distance:  $F_{1,5, 13.8} = 3.6$ ,  $P = 0.065$ . Both F-values are adjusted by Greenhouse-Geisser correction. X-axes indicate the concentration of Propranolol. M: molar.
